# Supplementary material for: Prefrontal cortex neuronal ensembles encoding fear drive fear expression during long-term memory retrieval
Source: PubMed Central journal article supplement (PMC6656710; doi:10.1038/s41598-019-47095-7), 2019-07-24
Supplement: 41598_2019_47095_MOESM1_ESM.pdf [file 41598_2019_47095_MOESM1_ESM.pdf]

## Supplementary materials

### **Prefrontal cortex neuronal ensembles encoding fear drive fear expression during long-term memory retrieval**

Giuseppe Giannotti<sup>1,2</sup>, Jasper A. Heinsbroek<sup>1,2</sup>, Alexander J. Yue<sup>1</sup>, Karl Deisseroth<sup>3,4</sup>, and Jamie Peters<sup>1,2\*</sup>

<sup>1</sup>Department of Neuroscience, Medical University of South Carolina, Charleston, SC, USA

<sup>2</sup>Department of Anesthesiology, Department of Pharmacology, University of Colorado Denver, Anschutz Medical Campus, Aurora, CO, USA

<sup>3</sup>Department of Bioengineering, CNC Program, Stanford University, Stanford, CA, USA

<sup>4</sup>Department of Psychiatry, Department of Biology, Stanford University, Stanford, CA, USA

\*correspondence to: [jamie.l.peters@ucdenver.edu](mailto:jamie.l.peters@ucdenver.edu)

## Supplemental Figure 1

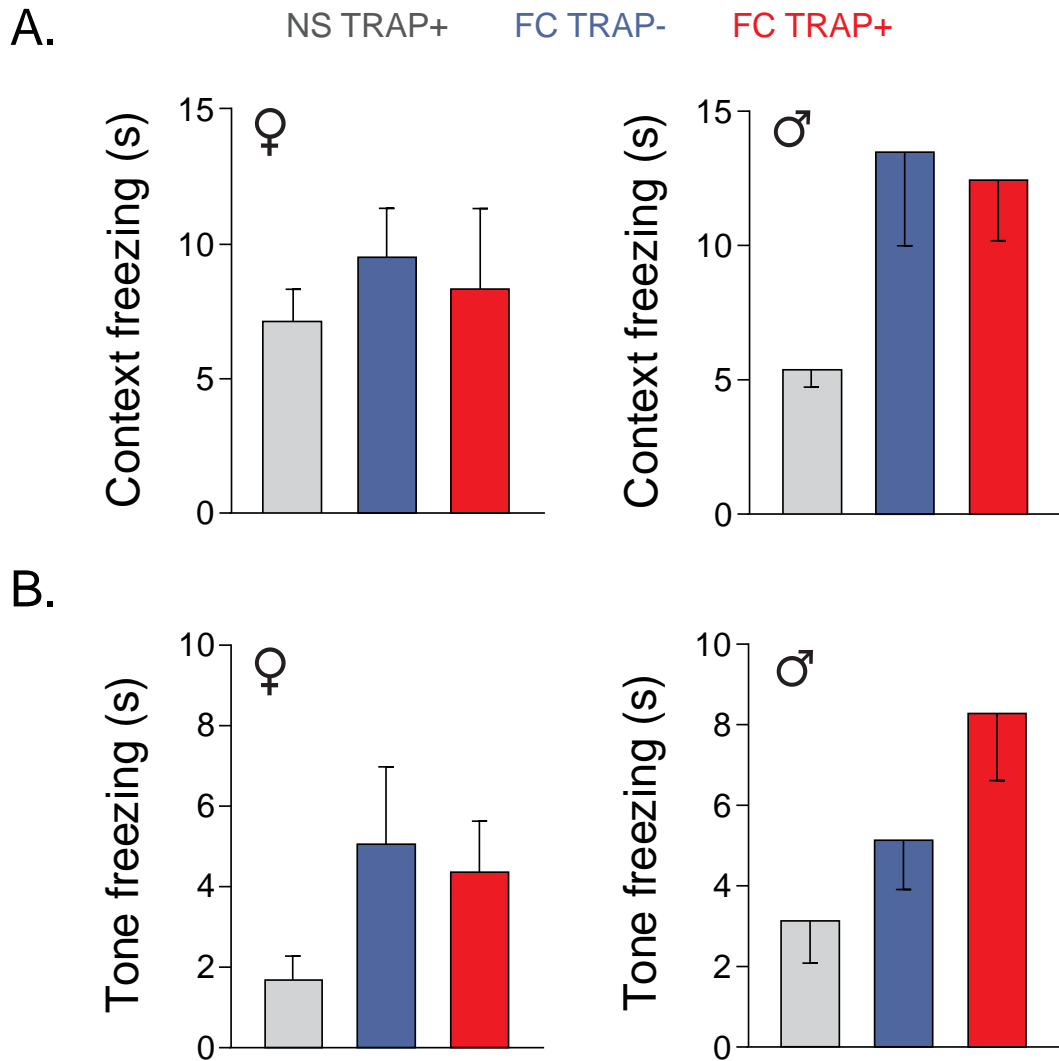

**Figure S1. No sex differences were observed in context or tone freezing at test.** A. Context freezing was not different between females (left) and males (right) [2-way ANOVA: No main effect of sex or interaction. Main effect of treatment  $F(2,30) = 3.618$ ,  $p = 0.0391$ ]. B. Tone freezing also did not differ by sex [2-way ANOVA: No main effect of sex or interaction. Main effect of treatment  $F(2,30) = 4.765$ ,  $p = 0.0160$ ].
